# Supplementary material for: Coronavirus disease 2019 among pregnant Chinese women: case series data on the safety of vaginal birth and breastfeeding
Source: PubMed Central journal article supplement (PMC7383704; doi:10.1111/1471-0528.16276), 2020-05-26
Supplement: BJO-127-1109-s001.pdf [file BJO-127-1109-s001.pdf]

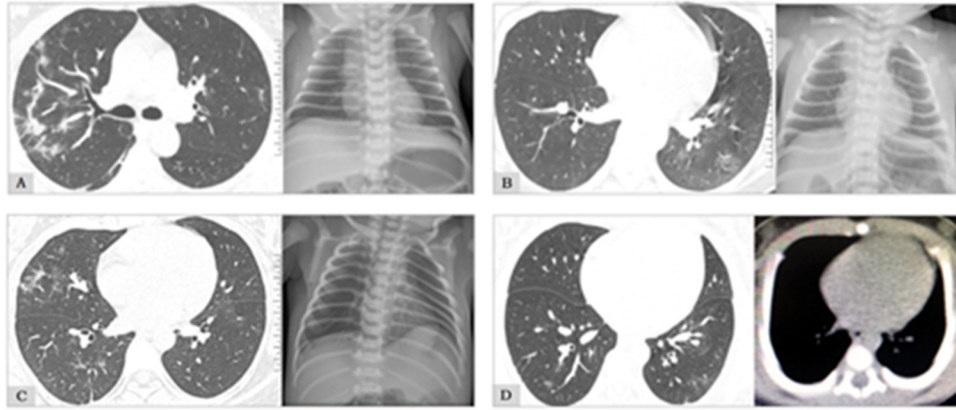

**Figure legend:** (A) Patient 1 (left, chest CT), bilateral multiple ground-glass densities; neonate of patient 1 (right, chest radiography), pneumonia; (B) patient 2 (left, chest CT), bilateral multiple ground-glass densities; neonate of patient 2 (right, chest radiography), pneumonia; (C) patient 3 (left, chest CT), bilateral ground-glass opacities with diffuse lesions; neonate of patient 3 (right, chest radiography), bilateral increased bronchovascular shadows; (D) patient 4 (left, chest CT), bilateral multiple ground-glass opacities; neonate of patient 4 (right, chest CT), suspected pneumonia.

**Figure S1.** Imaging examination of the 4 delivered women and their neonates.
