# Supplementary material for: Coronavirus disease 2019 among pregnant Chinese women: case series data on the safety of vaginal birth and breastfeeding
Source: PubMed Central journal article supplement (PMC7383704; doi:10.1111/1471-0528.16276), 2020-05-26
Supplement: BJO-127-1109-s002.pdf [file BJO-127-1109-s002.pdf]

|                                                                                                                 |          |    |    |          |          |          |       |       |    |          |          |          |          |
|-----------------------------------------------------------------------------------------------------------------|----------|----|----|----------|----------|----------|-------|-------|----|----------|----------|----------|----------|
| Date of breast milk collection                                                                                  | Feb 29   | ND | ND | Feb 28   | Mar 2    | ND       | ND    | ND    | ND | ND       | ND       | ND       | ND       |
| Results of the patient's throat swab for viral nucleic acid on the day of breast milk collection <sup>c</sup>   | Negative | NP | NP | Positive | NK       | NP       | NP    | NP    | NP | NP       | NP       | NP       | NP       |
| Date of stool specimen collection                                                                               | ND       | ND | ND | Mar 5    | Mar 5    | Mar 8    | Mar 8 | Mar 5 | ND | Mar 8    | Mar 8    | Mar 8    | Mar 8    |
| Results of the patient's throat swab for viral nuclei acid on the day of stool specimen collection <sup>c</sup> | NP       | NP | NP | NK       | Negative | Positive | NK    | NK    | NP | Negative | Negative | Positive | Positive |

NK=Not known; ND=Not Done; NA=Not applicable

<sup>c</sup>Normally, testing of patients' throat swabs for viral nucleic acid and sample collection were not performed on the same day. If the viral nucleic acid testing of throat swabs was positive after the patient sample collection date, we considered the test to be "positive" on the day of sample collection. If the most recent viral nucleic acid testing before and after the day of sample collection was negative, we considered the test on the day of sample collection to be "negative". If the latest viral nucleic acid test of throat swabs was positive before the day of sample collection, and the subsequent throat swab test was negative, we did not know (NK) the throat swab testing result on the day of sample collection.

**Table S2.** Date of neonatal sample collection

|                                                                                      | <b>Patient 1</b> | <b>Patient 2</b> | <b>Patient 3</b> | <b>Patient 4</b> | <b>Patient 5</b> |
|--------------------------------------------------------------------------------------|------------------|------------------|------------------|------------------|------------------|
| Date of birth                                                                        | Feb 2            | Feb 3            | Feb 14           | Feb 22           | Mar 1            |
| Results from the maternal throat swab for viral nucleic acid on the day of delivery* | Positive         | Positive         | Positive         | Positive         | Positive         |
| Date of neonatal throat swab collection (the first time)                             | Feb 3            | Feb 4            | Feb15            | Feb 23           | Mar 2            |
| Date of neonatal anal swab collection (the first time)                               | Feb 3            | Feb 4            | Feb15            | Feb 23           | Mar 2            |
| Date of neonatal throat swab collection (the second time)                            | Feb 5            | Feb 6            | Feb 17           | Feb 25           | Mar 4            |
| Date of neonatal anal swab collection (the second time)                              | Feb 5            | Feb 6            | Feb 17           | Feb 25           | Mar 4            |

**Table S3.** Samples of clinical and laboratory characteristics

|                           | Patient 1 | Patient 2 | Patient 3 | Patient 4 | Patient 5 | Patient 6 | Patient 7 | Patient 8 | Patient 9 | Patient 10 | Patient 11 | Patient 12 | Patient 13 | n (%) |
|---------------------------|-----------|-----------|-----------|-----------|-----------|-----------|-----------|-----------|-----------|------------|------------|------------|------------|-------|
| Clinical characteristics  |           |           |           |           |           |           |           |           |           |            |            |            |            |       |
| Date of onset             | Jan 22    | Feb 3     | NK        | Jan 28    | Mar 1     | Mar 2     | Jan 26    | Feb 4     | Jan 25    | Feb 20     | Jan 31     | Feb 5      | Feb 18     | -     |
| Date of admission         | Feb 1     | Feb 3     | Feb 14    | Feb 2     | Mar 1     | Mar 4     | Feb 9     | Feb9      | Feb 5     | Feb 23     | Feb 15     | Feb 13     | Feb 25     | -     |
| Onset to admission (days) | 10        | 0         | NK        | 5         | 0         | 2         | 14        | 5         | 11        | 3          | 15         | 8          | 7          | -     |
| Age (years)               | 29        | 26        | 29        | 28        | 27        | 31        | 40        | 36        | 28        | 27         | 29         | 32         | 35         | -     |
| Height (cm)               | 163       | 165       | 163       | 155       | 162       | 169       | 155       | 155       | 172       | 172        | 167        | 155        | 156        | -     |
| Weight (Kg)               | 70        | 48        | 60        | 55        | 51        | 54        | 49        | 53        | 67.5      | 65         | 65         | 57         | 55         | -     |
| BMI                       | 26.3      | 17.6      | 22.6      | 22.9      | 19.4      | 18.9      | 20.4      | 22.1      | 22.8      | 22.0       | 19.7       | 23.7       | 22.6       | -     |
| Gravidity                 | 2         | 1         | 2         | 1         | 2         | 3         | 4         | 2         | 2         | 1          | 1          | 1          | 2          | -     |
| Parity                    | 1         | 1         | 2         | 1         | 1         | 1         | 2         | 1         | 0         | 0          | 0          | 1          | 1          | -     |

|                                            |                                                 |                                    |                                    |                                |                                    |                                    |                                    |                                    |                                    |                                |                                    |                                    |                                    |           |
|--------------------------------------------|-------------------------------------------------|------------------------------------|------------------------------------|--------------------------------|------------------------------------|------------------------------------|------------------------------------|------------------------------------|------------------------------------|--------------------------------|------------------------------------|------------------------------------|------------------------------------|-----------|
| Miscarriage history                        | Yes                                             | No                                 | No                                 | No                             | Yes                                | Yes                                | Yes                                | No                                 | Yes                                | No                             | No                                 | No                                 | No                                 | 5 (38%)   |
| Health care worker                         | No                                              | No                                 | No                                 | No                             | No                                 | No                                 | No                                 | No                                 | No                                 | No                             | No                                 | No                                 | No                                 | 0         |
| Gestational age upon admission             | 35 <sup>+5</sup> weeks                          | 35 <sup>+5</sup> weeks             | 38 <sup>+4</sup> weeks             | 35 weeks                       | 38 <sup>+2</sup> weeks             | 32 <sup>+4</sup> weeks             | 8 <sup>+5</sup> weeks              | 16 <sup>+1</sup> weeks             | 6 <sup>+3</sup> weeks              | 11 <sup>+5</sup> weeks         | 18 weeks                           | 5 <sup>+1</sup> weeks              | 9 <sup>+3</sup> weeks              | -         |
| Gestational weeks at diagnosis of COVID-19 | 35 <sup>+5</sup> weeks                          | 35 <sup>+6</sup> weeks             | 38 <sup>+4</sup> weeks             | 35 <sup>+4</sup> weeks         | 38 <sup>+2</sup> weeks             | 32 <sup>+2</sup> weeks             | 8 <sup>+2</sup> weeks              | 15 <sup>+6</sup> weeks             | 5 <sup>+3</sup> weeks              | 11 <sup>+2</sup> weeks         | 17 weeks                           | 4 <sup>+2</sup> weeks              | 9 weeks                            | -         |
| Epidemiology history                       | Yes                                             | Yes                                | Yes                                | Yes                            | Yes                                | Yes                                | Yes                                | Yes                                | Yes                                | Yes                            | Yes                                | Yes                                | Yes                                | 13 (100%) |
|                                            | (Exposure to relevant environment) <sup>a</sup> | (Exposure to relevant environment) | (Exposure to relevant environment) | (Contact with infected person) | (Exposure to relevant environment) | (Exposure to relevant environment) | (Exposure to relevant environment) | (Exposure to relevant environment) | (Exposure to relevant environment) | (Contact with infected person) | (Exposure to relevant environment) | (Exposure to relevant environment) | (Exposure to relevant environment) |           |
| Complications                              | None                                            | None                               | None                               | Thrombocytopenia               | PROM                               | None                               | None                               | None                               | None                               | None                           | Chronic nephritis                  | None                               | None                               | 3 (23%)   |

|                                   |      |      |      |      |      |      |      |      |      |      |      |      |      |         |
|-----------------------------------|------|------|------|------|------|------|------|------|------|------|------|------|------|---------|
| Patient condition                 | Mild | Mild | Mild | Mild | Mild | Mild | Mild | Mild | Mild | Mild | Mild | Mild | Mild | -       |
| <b>Signs and symptoms</b>         |      |      |      |      |      |      |      |      |      |      |      |      |      |         |
| Fever                             | Yes  | No   | No   | Yes  | No   | No   | Yes  | Yes  | Yes  | No   | Yes  | Yes  | Yes  | 8 (62%) |
| Post-partum fever                 | No   | No   | No   | No   | No   | No   | No   | No   | No   | No   | No   | No   | No   | 0       |
| Myalgia                           | No   | No   | No   | No   | No   | No   | No   | No   | No   | No   | No   | Yes  | No   | 1 (8%)  |
| Malaise                           | No   | No   | No   | No   | No   | No   | No   | No   | No   | No   | No   | No   | No   | 0       |
| Rigor                             | No   | No   | No   | No   | No   | No   | No   | No   | No   | No   | No   | No   | No   | 0       |
| Cough                             | Yes  | No   | No   | No   | No   | No   | Yes  | Yes  | Yes  | No   | No   | No   | Yes  | 5(38%)  |
| Dyspnea                           | Yes  | No   | No   | No   | No   | No   | No   | No   | No   | No   | No   | No   | No   | 1 (8%)  |
| Sore throat                       | No   | No   | No   | No   | No   | No   | No   | No   | No   | No   | No   | No   | No   | 0       |
| Diarrhea                          | Yes  | No   | No   | No   | No   | No   | No   | No   | No   | No   | No   | No   | No   | 1 (8%)  |
| Chest pain                        | No   | No   | No   | No   | No   | No   | No   | No   | No   | No   | No   | No   | No   | 0       |
| <b>Laboratory characteristics</b> |      |      |      |      |      |      |      |      |      |      |      |      |      |         |

**(Before delivery)**

White blood cell count

( $\times 10^9$  cells/L)

4.28    8.59    17.37    8.03    12.09    6.27    4.98    4.58    3.95    7.43    11.00    5.59    10.20

-

Low or normal leukocyte

count ( $< 9.5 \times 10^9$  cells/L)

Yes    Yes    No    Yes    No    Yes    Yes    Yes    Yes    Yes    Yes    Yes    No

10

(77%)

Lymphocyte count ( $\times 10^9$

cells/L)

1.01    0.89    1.61    1.08    1.06    1.07    1.51    0.88    1.41    1.93    2.11    1.09    1.88

-

Lymphopenia ( $< 10^9$  cells/L)

No    Yes    No    No    No    No    No    Yes    No    No    No    No    No

2 (15%)

C-reactive protein

concentration (mg/L)

53.2    38.5     $< 5.0$     57.0     $< 5.0$      $< 5.0$      $< 5.0$     66.1     $< 5.0$      $< 5.0$      $< 5.0$      $< 5.0$     83.2

-

Elevated C-reactive protein

( $> 10$  mg/L)

Yes    Yes    No    Yes    No    No    No    Yes    No    No    No    No    Yes

5 (38%)

Elevated ALT ( $> 45$  U/L) or

No    No    No    Yes    No    No    No    No    No    Yes    No    No    No    Yes

3 (23%)

AST (>35 U/L)

ALT (U/L) 13 12 15 40 6 9 29 11 115 20 9 31 54 -

AST (U/L) 26 23 19 38 13 14 24 23 80 13 15 24 32 -

Diagnostic method RT-PCR -

Typical signs of viral

infection (CT evidence of pneumonia) Yes Yes Yes Yes No ND Yes Yes ND Yes ND Yes No -

Detection of SARS-CoV-2 in

vaginal secretions Negative 0

Detection of SARS-CoV-2 in

maternal stool specimens ND ND ND Negative Negative Negative Negative Negative ND Negative Negative Positive Negative -

**Treatment**

Oxygen support (nasal Yes 13



cannula)

(100%)

Antiviral therapy

Oseltamivir, Oseltamivir

arbidole, , arbidole, Oseltamivir

ribavirin, ribavirin, Arbidole , arbidole, Arbidole Arbidole Arbidole Arbidole Oseltamivir Arbidole Arbidole Oseltamivir Oseltamivir 13

hydroxychlor hydroxychl ribavirin , arbidole (100%)

oquine oroquine

Antibiotic therapy

No No No No ne and No Cefoperazo ne and Cefoperazo ne and Cefoperazo ne and Cefoperazo ne and Cefoperazo 8 (62%)

Azithromyci

Cefoperazo

n,

ne and

Cefoperazo

tazobactam

,

moxifloxaci

n

,

n

cefaclor

Cefoperazo

ne and

Cefoperazo

tazobactam

,

azithromyci

n

|                       |                        |            |            |                        |            |                 |                        |                 |                 |                 |                 |                       |                 |         |
|-----------------------|------------------------|------------|------------|------------------------|------------|-----------------|------------------------|-----------------|-----------------|-----------------|-----------------|-----------------------|-----------------|---------|
| Use of corticosteroid | Methylpredn<br>isolone | No         | No         | Methylpred<br>nisolone | No         | No              | Methylpred<br>nisolone | No              | No              | No              | No              | No                    | No              | 3 (23%) |
| Pregnancy outcomes    | Live birth             | Live birth | Live birth | Live birth             | Live birth | In<br>pregnancy | In<br>pregnancy        | In<br>pregnancy | In<br>pregnancy | In<br>pregnancy | In<br>pregnancy | Chemical<br>pregnancy | In<br>pregnancy | -       |
| Current situation     | Cured                  | Cured      | Cured      | Cured                  | Cured      | Cured           | Cured                  | Cured           | Cured           | Cured           | Cured           | Cured                 | Cured           | -       |

---

NK=Not known; ND=Not Done; ALT=alanine transaminase; AST=aspartate transaminase; BMI=Body mass index; CT=Computed tomography; PROM=Premature rupture of membrane. <sup>a</sup>Exposure to relevant environment: Due to the outbreak in Wuhan, and these women live in Wuhan. Therefore, although there was no clear history of contact with COVID-19 patients, they were still considered to have a risk of infection.

**Table S4.** Neonatal outcomes

|                                                    | Patient 1 | Patient 2 | Patient 3 | Patient 4 | Patient 5 | n (%)   |
|----------------------------------------------------|-----------|-----------|-----------|-----------|-----------|---------|
| Birth weight (g)                                   | 2830      | 2300      | 2650      | 3120      | 3910      | -       |
| Low birth weight (<2500 g)                         | No        | Yes       | No        | No        | No        | 1 (20%) |
| Premature delivery                                 | Yes       | Yes       | No        | No        | No        | 2 (40%) |
| Small for gestational age (<10 <sup>th</sup> %ile) | No        | No        | No        | No        | No        | 0       |
| Appropriate for gestational age                    | Yes       | Yes       | Yes       | Yes       | No        | 4 (80%) |
| Large for gestational age (>90 <sup>th</sup> %ile) | No        | No        | No        | No        | Yes       | 1 (20%) |
| Apgar score (1 min, 5 min)                         | 9, 10     | 9, 10     | 7, 9      | 9, 10     | 9, 10     | -       |
| Neonatal asphyxia                                  | No        | No        | Yes       | No        | No        | 1 (20%) |
| Neonatal death                                     | No        | No        | No        | No        | No        | 0       |
| Fetal death or stillbirth                          | No        | No        | No        | No        | No        | 0       |
| Detection of SARS-CoV-2 in neonate                 | Negative  | Negative  | Negative  | Negative  | Negative  | 0       |

|                                                      |               |               |                                 |                            |    |   |
|------------------------------------------------------|---------------|---------------|---------------------------------|----------------------------|----|---|
| (throat swab, the first day after delivery)          |               |               |                                 |                            |    |   |
| Detection of SARS-CoV-2 in neonate                   | Negative      | Negative      | Negative                        | Negative                   | ND | - |
| (anal swab, the first day after delivery)            |               |               |                                 |                            |    |   |
| Detection of SARS-CoV-2 in neonate (throat swab, the | Negative      | Negative      | Negative                        | Negative                   | ND | - |
| third day after delivery)                            |               |               |                                 |                            |    |   |
| Detection of SARS-CoV-2 in neonate (anal swab, the   | Negative      | Negative      | Negative                        | Negative                   | ND | - |
| third day after delivery)                            |               |               |                                 |                            |    |   |
| Imaging results (days after birth)                   | Pneumoni<br>a | Pneumoni<br>a | Increase of<br>lung<br>markings | Suspected<br>pneumoni<br>a | ND | - |

---

ND=Not done.
